## Aspirin for COVID-19

1  
2  
3  
4  
5  
6  
7  
8  
9  
10  
11  
12  
13  
14  
15  
16  
17  
18  
19  
20  
21  
22  
23  
24  
25  
26  
27

# **Aspirin in patients admitted to hospital with COVID-19 (RECOVERY): a randomised, controlled, open-label, platform trial**

**Running title:** Aspirin for COVID-19

**RECOVERY Collaborative Group\***

\*The writing committee and trial steering committee are listed at the end of this manuscript and a complete list of collaborators in the Randomised Evaluation of COVID-19 Therapy (RECOVERY) trial is provided in the Supplementary Appendix.

Correspondence to: Prof Peter W Horby and Prof Martin J Landray, RECOVERY Central Coordinating Office, Richard Doll Building, Old Road Campus, Roosevelt Drive, Oxford OX3 7LF, United Kingdom.

Email: [recoverytrial@ndph.ox.ac.uk](mailto:recoverytrial@ndph.ox.ac.uk)

Word count:

Abstract – 301 words

Main text – 3085 words

References – 33

Tables & Figures – 2 + 3

## Aspirin for COVID-19

### 28 SUMMARY

29 **Background:** Aspirin has been proposed as a treatment for COVID-19 on the basis  
30 of its antithrombotic properties.

31 **Methods:** In this randomised, controlled, open-label platform trial, several possible  
32 treatments were compared with usual care in patients hospitalised with COVID-19.  
33 Eligible and consenting adults were randomly allocated in a 1:1 ratio to either usual  
34 standard of care plus 150mg aspirin once daily until discharge or usual standard of  
35 care alone using web-based simple (unstratified) randomisation with allocation  
36 concealment. The primary outcome was 28-day mortality. The trial is registered with  
37 ISRCTN (50189673) and clinicaltrials.gov (NCT04381936).

38 **Findings:** Between 01 November 2020 and 21 March 2021, 7351 patients were  
39 randomly allocated to receive aspirin and 7541 patients to receive usual care alone.  
40 Overall, 1222 (17%) patients allocated to aspirin and 1299 (17%) patients allocated to  
41 usual care died within 28 days (rate ratio 0.96; 95% confidence interval [CI] 0.89-1.04;  
42  $p=0.35$ ). Consistent results were seen in all pre-specified subgroups of patients.  
43 Patients allocated to aspirin had a slightly shorter duration of hospitalisation (median  
44 8 vs. 9 days) and a higher proportion were discharged from hospital alive within 28  
45 days (75% vs. 74%; rate ratio 1.06; 95% CI 1.02-1.10;  $p=0.0062$ ). Among those not  
46 on invasive mechanical ventilation at baseline, there was no significant difference in  
47 the proportion meeting the composite endpoint of invasive mechanical ventilation or  
48 death (21% vs. 22%; risk ratio 0.96; 95% CI 0.90-1.03;  $p=0.23$ ). Aspirin use was  
49 associated with an absolute reduction in thrombotic events of 0.6% (SE 0.4%) and an  
50 absolute increase in major bleeding events of 0.6% (SE 0.2%).

## Aspirin for COVID-19

51 **Interpretation:** In patients hospitalised with COVID-19, aspirin was not associated  
52 with reductions in 28-day mortality or in the risk of progressing to invasive mechanical  
53 ventilation or death but was associated with a small increase in the rate of being  
54 discharged alive within 28 days.

55 **Funding:** UK Research and Innovation (Medical Research Council), National Institute  
56 of Health Research (Grant ref: MC\_PC\_19056), and the Wellcome Trust (Grant Ref:  
57 222406/Z/20/Z) through the COVID-19 Therapeutics Accelerator.

58 **Keywords:** COVID-19, aspirin, clinical trial.

59

## Aspirin for COVID-19

### 60 **INTRODUCTION**

61 Thrombosis is a key feature of severe COVID-19, with 5-30% of hospitalised patients  
62 (depending on illness severity) experiencing a major venous thromboembolic event  
63 (mostly pulmonary embolism) and up to 3% an arterial thromboembolic event,  
64 particularly myocardial infarction and ischaemic stroke.<sup>1,2</sup> The risk of thromboembolic  
65 complications is reported to be higher in COVID-19 than in other acute medical  
66 illnesses and viral respiratory infections, and is associated with worse prognosis.<sup>3,4</sup>

67 Antiplatelet therapy may have beneficial effects in severe COVID-19 through several  
68 mechanisms including inhibition of platelet aggregation, reduction of platelet-derived  
69 inflammation, and blocking thrombogenic neutrophil extracellular traps and  
70 disseminated intravascular coagulation.<sup>5</sup> Aspirin is an affordable, globally available  
71 drug which at low doses irreversibly inhibits the COX-1 enzyme which is responsible  
72 for production of thromboxane A<sub>2</sub> and pro-inflammatory prostaglandins. Aspirin can  
73 reduce both arterial and venous thrombotic events and has been shown to abolish in-  
74 vitro hyperactivity in platelets from SARS-CoV-2 infected patients.<sup>6,7</sup> Existing  
75 randomized evidence has shown that 75-150mg aspirin daily is as effective as higher  
76 doses in preventing cardiovascular events.<sup>6</sup>

77 Seven clinical trials of aspirin in COVID-19 are registered but none have yet reported  
78 on the effect of aspirin therapy in COVID-19. Here we report the results of a large  
79 randomised controlled trial of aspirin in patients hospitalised with COVID-19.

80

### 81 **METHODS**

## Aspirin for COVID-19

### 82 **Study design and participants**

83 The Randomised Evaluation of COVID-19 therapy (RECOVERY) trial is an  
84 investigator-initiated, individually randomised, controlled, open-label, platform trial to  
85 evaluate the effects of potential treatments in patients hospitalised with COVID-19.  
86 Details of the trial design and results for other treatments evaluated (lopinavir-ritonavir,  
87 hydroxychloroquine, dexamethasone, azithromycin, tocilizumab, convalescent  
88 plasma, and colchicine) have been published previously.<sup>8-14</sup> The trial is underway at  
89 177 hospitals in the United Kingdom, two hospitals in Indonesia, and two hospitals in  
90 Nepal (appendix pp 5-25), supported in the UK by the National Institute for Health  
91 Research Clinical Research Network. The trial is coordinated by the Nuffield  
92 Department of Population Health at the University of Oxford (Oxford, UK), the trial  
93 sponsor. The trial is conducted in accordance with the principles of the International  
94 Conference on Harmonisation–Good Clinical Practice guidelines and approved by the  
95 UK Medicines and Healthcare products Regulatory Agency (MHRA) and the  
96 Cambridge East Research Ethics Committee (ref: 20/EE/0101). The protocol,  
97 statistical analysis plan, and additional information are available on the study website  
98 [www.recoverytrial.net](http://www.recoverytrial.net).

99 Patients admitted to hospital were eligible for the trial if they had clinically suspected  
100 or laboratory confirmed SARS-CoV-2 infection and no medical history that might, in  
101 the opinion of the attending clinician, put the patient at significant risk if they were to  
102 participate in the trial. Children aged <18 years were not eligible for randomisation to  
103 aspirin. Patients with known hypersensitivity to aspirin, a recent history of major  
104 bleeding, or currently receiving aspirin or another antiplatelet treatment were

## Aspirin for COVID-19

105 excluded. Written informed consent was obtained from all patients, or a legal  
106 representative if they were too unwell or unable to provide consent.

### 107 **Randomisation and masking**

108 Baseline data were collected using a web-based case report form that included  
109 demographics, level of respiratory support, major comorbidities, suitability of the study  
110 treatment for a particular patient, and treatment availability at the study site (appendix  
111 p33-34). Eligible and consenting adult patients were assigned in a 1:1 ratio to either  
112 usual standard of care or usual standard of care plus aspirin using web-based simple  
113 (unstratified) randomisation with allocation concealed until after randomisation  
114 (appendix p30). For some patients, aspirin was unavailable at the hospital at the time  
115 of enrolment or was considered by the managing physician to be either definitely  
116 indicated or definitely contraindicated. These patients were excluded from the  
117 randomised comparison between usual care plus aspirin and usual care alone.  
118 Patients allocated to aspirin were to receive 150 mg by mouth (or nasogastric tube) or  
119 per rectum daily until discharge.

120 As a platform trial, and in a factorial design, patients could be simultaneously  
121 randomised to other treatment groups: i) azithromycin or colchicine or dimethyl  
122 fumarate versus usual care, ii) convalescent plasma or monoclonal antibody (REGN-  
123 CoV2) versus usual care, and iii) baricitinib versus usual care (appendix pp 30). Until  
124 24 January 2021, the trial also allowed a subsequent randomisation for patients with  
125 progressive COVID-19 (evidence of hypoxia and a hyper-inflammatory state) to  
126 tocilizumab versus usual care. Participants and local study staff were not masked to  
127 the allocated treatment. The trial steering committee, investigators, and all other

## Aspirin for COVID-19

128 individuals involved in the trial were masked to aggregated outcome data during the  
129 trial.

### 130 **Procedures**

131 A single online follow-up form was completed when participants were discharged, had  
132 died or at 28 days after randomisation, whichever occurred earliest (appendix p 35-  
133 41). Information was recorded on adherence to allocated study treatment, receipt of  
134 other COVID-19 treatments, duration of admission, receipt of respiratory or renal  
135 support, and vital status (including cause of death). In addition, in the UK, routine  
136 healthcare and registry data were obtained including information on vital status (with  
137 date and cause of death), discharge from hospital, receipt of respiratory support, or  
138 renal replacement therapy.

### 139 **Outcomes**

140 Outcomes were assessed at 28 days after randomisation, with further analyses  
141 specified at 6 months. The primary outcome was all-cause mortality. Secondary  
142 outcomes were time to discharge from hospital, and, among patients not on invasive  
143 mechanical ventilation at randomisation, progression to invasive mechanical  
144 ventilation (including extra-corporeal membrane oxygenation) or death. Prespecified  
145 subsidiary clinical outcomes were use of non-invasive respiratory support, time to  
146 successful cessation of invasive mechanical ventilation (defined as cessation of  
147 invasive mechanical ventilation within, and survival to, 28 days), use of renal dialysis  
148 or haemofiltration, cause-specific mortality, major bleeding events (defined as  
149 intracranial bleeding or bleeding requiring transfusion, endoscopy, surgery or  
150 vasoactive drugs), thrombotic events (defined as acute pulmonary embolism, deep  
151 vein thrombosis, ischaemic stroke, myocardial infarction or systemic arterial

## Aspirin for COVID-19

152 embolism) and major cardiac arrhythmias. Information on suspected serious adverse  
153 reactions was collected in an expedited fashion to comply with regulatory  
154 requirements.

### 155 **Statistical Analysis**

156 An intention-to-treat comparison was conducted between patients randomised to  
157 aspirin and patients randomised to usual care but for whom aspirin was both available  
158 and suitable as a treatment. For the primary outcome of 28-day mortality, the log-rank  
159 observed minus expected statistic and its variance were used to both test the null  
160 hypothesis of equal survival curves (i.e., the log-rank test) and to calculate the one-  
161 step estimate of the average mortality rate ratio. We constructed Kaplan-Meier survival  
162 curves to display cumulative mortality over the 28-day period. We used the same  
163 method to analyse time to hospital discharge and successful cessation of invasive  
164 mechanical ventilation, with patients who died in hospital right-censored on day 29.  
165 Median time to discharge was derived from Kaplan-Meier estimates. For the pre-  
166 specified composite secondary outcome of progression to invasive mechanical  
167 ventilation or death within 28 days (among those not receiving invasive mechanical  
168 ventilation at randomisation), and the subsidiary clinical outcomes of receipt of  
169 ventilation and use of haemodialysis or haemofiltration, the precise dates were not  
170 available and so the risk ratio was estimated instead.

171 Prespecified subgroup analyses (defined by characteristics at randomisation: age,  
172 sex, ethnicity, level of respiratory support, days since symptom onset, and use of  
173 corticosteroids) were performed for the primary outcome using the statistical test of  
174 interaction (test for heterogeneity or trend), in accordance with the prespecified  
175 analysis plan (appendix p 113). A sensitivity analysis restricting analysis of the primary



## Aspirin for COVID-19

176 outcome to patients with a positive PCR test for SARS-COV-2 was conducted. In  
177 addition, post-hoc exploratory analyses of the primary and secondary outcomes by  
178 venous thromboprophylaxis treatment at randomisation was conducted. Observed  
179 effects within subgroup categories were compared using a chi-squared test for  
180 heterogeneity or trend, in accordance with the prespecified analysis plan.

181 Estimates of rate and risk ratios are shown with 95% confidence intervals. All p-values  
182 are 2-sided and are shown without adjustment for multiple testing. The full database  
183 is held by the study team which collected the data from study sites and performed the  
184 analyses at the Nuffield Department of Population Health, University of Oxford  
185 (Oxford, UK).

186 As stated in the protocol, appropriate sample sizes could not be estimated when the  
187 trial was being planned at the start of the COVID-19 pandemic (appendix p 53). As the  
188 trial progressed, the trial steering committee, whose members were unaware of the  
189 results of the trial comparisons, determined that sufficient patients should be enrolled  
190 to provide at least 90% power at a two-sided significance level of 1% to detect a  
191 clinically relevant proportional reduction in 28-day mortality of 12.5% between the two  
192 groups. Consequently, on 21 March, 2021, the steering committee, masked to the  
193 results, closed recruitment to the aspirin comparison as sufficient patients had been  
194 recruited.

195 Analyses were performed using SAS version 9.4 and R version 4.0.3. The trial is  
196 registered with ISRCTN (50189673) and clinicaltrials.gov (NCT04381936).

197 **Role of the funding source**

## Aspirin for COVID-19

198 The funder of the study had no role in study design, data collection, data analysis, data  
199 interpretation, or writing of the report. The corresponding authors had full access to all  
200 the data in the study and had final responsibility for the decision to submit for  
201 publication.

202

### 203 **RESULTS**

204 Between 1 November 2020 and 21 March 2021, 14892 (66%) of 22560 patients  
205 enrolled into the RECOVERY trial were eligible to be randomly allocated to aspirin (i.e.  
206 aspirin was available in the hospital at the time and the attending clinician was of the  
207 opinion that the patient had no known indication for or contraindication to aspirin, figure  
208 1). 7351 patients were randomly allocated to usual care plus aspirin and 7541 were  
209 randomly allocated to usual care alone. The mean age of study participants in this  
210 comparison was 59.2 years (SD 14.2) and the median time since symptom onset was  
211 9 days (IQR 6 to 12 days) (webtable 1). At randomisation, 5035 patients (34%) were  
212 receiving thromboprophylaxis with higher dose low molecular weight heparin (LMWH),  
213 8878 (60%) with standard dose LMWH, and 979 (7%) were not receiving  
214 thromboprophylaxis.

215 The follow-up form was completed for 7290 (99%) participants in the aspirin group and  
216 7457 (99%) participants in the usual care group. Among participants with a completed  
217 follow-up form, 6587 (90%) allocated to aspirin received at least one dose and 210  
218 (3%) allocated to usual care received at least one dose of aspirin (figure 1; webtable  
219 2). Of the 6587 participants allocated to aspirin that received at least one dose of  
220 aspirin, 5040 (77%) received aspirin on most days following randomisation ( $\geq 90\%$  of  
221 the days from randomisation to time to discharge or 28 days after randomisation,

## Aspirin for COVID-19

222 whichever was earlier). Use of other treatments for COVID-19 was similar among  
223 participants allocated aspirin and among those allocated usual care, with nearly 90%  
224 receiving a corticosteroid, about one-quarter receiving remdesivir, and one-eighth  
225 receiving tocilizumab (webtable 2).

226 Primary and secondary outcome data are known for 99% of randomly assigned  
227 patients. We observed no significant difference in the proportion of patients who met  
228 the primary outcome of 28-day mortality between the two randomised groups (1222  
229 [17%] patients in the aspirin group vs. 1299 (17%) patients in the usual care group;  
230 rate ratio 0.96; 95% confidence interval [CI], 0.89 to 1.04;  $p=0.35$ ; figure 2, table 2).  
231 The rate ratio was similar across all pre-specified sub-groups (figure 3). In an  
232 exploratory analysis restricted to the 14467 (97%) patients with a positive SARS-CoV-  
233 2 test result, the result was virtually identical (rate ratio 0.96, 95% CI 0.89 to 1.04;  
234  $p=0.31$ ).

235 Allocation to aspirin was associated with a reduction of 1 day in median time until  
236 discharge alive from hospital compared to usual care (median 8 days vs. 9 days [IQR  
237 for each 5 to >28 days]) and an increased rate of discharge alive within 28 days (75%  
238 vs. 74%, rate ratio 1.06, 95% CI 1.02 to 1.10,  $p=0.0062$ ) (table 2). Among those not  
239 on invasive mechanical ventilation at baseline, the number of patients progressing to  
240 the pre-specified composite secondary outcome of invasive mechanical ventilation or  
241 death among those allocated to aspirin was similar to that among those allocated to  
242 usual care (21% vs. 22%, risk ratio 0.96, 95% CI 0.90 to 1.03,  $p=0.23$ ). There was no  
243 evidence that the effect of allocation to aspirin vs. usual care on time until discharge  
244 alive from hospital or on invasive mechanical ventilation or death differed between the  
245 pre-specified subgroups of patients (webfigure 1, webfigure 2). In a post-hoc

## Aspirin for COVID-19

246 exploratory analysis there was no evidence that the effect of allocation to aspirin vs.  
247 usual care on the primary and secondary outcomes differed by use of LMWH use at  
248 randomisation (webfigure 3).

249 We found no significant differences in the prespecified subsidiary clinical outcomes of  
250 cause-specific mortality (webtable 3), use of ventilation, successful cessation of  
251 invasive mechanical ventilation, or receipt of renal dialysis or haemofiltration (table 2).

252 As expected with the use of aspirin, the incidence of thrombotic events was lower  
253 (4.6% vs. 5.3%; absolute difference 0.6%, SE 0.4%) and the incidence of major  
254 bleeding events was higher (1.6% vs. 1.0%; absolute difference 0.6%, SE 0.2%) in  
255 the aspirin group (webtable 4). The incidence of new cardiac arrhythmias was similar  
256 in the two groups (webtable 5). There were 18 reports of a serious adverse event  
257 believed related to aspirin, all of which were due to haemorrhagic events (webtable 6).

258

## 259 **DISCUSSION**

260 In this large, randomised trial involving over 14,000 patients and over 2000 deaths,  
261 allocation to aspirin was not associated with reductions in mortality or, among those  
262 not on invasive mechanical ventilation at baseline, the risk of progressing to the  
263 composite endpoint of invasive mechanical ventilation or death. Allocation to aspirin  
264 was, however, associated with a small increase in the rate of being discharged from  
265 hospital alive within 28 days. These results were consistent across the prespecified  
266 subgroups of age, sex, ethnicity, duration of symptoms prior to randomisation, level of  
267 respiratory support at randomisation, and use of corticosteroids.

## Aspirin for COVID-19

268 As expected, allocation to aspirin was associated with an increased risk of major  
269 bleeding and a decreased risk of thromboembolic complications, such that for every  
270 1000 patients treated with aspirin, approximately 6 more would experience a major  
271 bleeding event and approximately 6 fewer would experience a thromboembolic event.  
272 The rate of reported thromboembolic events in our study population was low (5.3% in  
273 the usual care arm) in comparison with previous reports.<sup>1,2</sup> This could be related to the  
274 widespread use of corticosteroids in the trial population resulting in reduced thrombo-  
275 inflammatory stimulus or because of the exclusion of patients already receiving aspirin  
276 because of prior cardiovascular disease. It is possible that aspirin might have a more  
277 meaningful benefit in populations with a higher thrombotic risk, although there would  
278 also likely be a corresponding increase in bleeding risk.<sup>15</sup>

279 The pathogenesis of thromboembolism in COVID-19 is likely to be multifactorial.  
280 Coagulopathy is common in severe COVID-19 and is associated with an inflammatory  
281 state, neutrophil extracellular traps, and poor outcomes.<sup>2,16-20</sup> Platelet activation is  
282 increased as a result (and potentially by direct interaction with the virus), amplifying  
283 inflammation locally and triggering immunothrombosis.<sup>21,22</sup> In addition, SARS-CoV-2  
284 infection can cause inflammation, dysfunction, and disruption of the vascular  
285 endothelium in multiple organs, potentially via direct entry through the ACE-2  
286 receptor.<sup>23-25</sup> The resulting endothelial injury and tissue factor exposure promote  
287 thrombosis in the pulmonary circulation and other vascular beds, with microangiopathy  
288 and alveolar capillary occlusion contributing to the diffuse alveolar damage and  
289 hypoxemia seen in COVID-19.<sup>24,26</sup> Furthermore, in autopsy studies pulmonary  
290 microthrombi are nine times more frequent in patients with COVID-19 compared to  
291 patients with influenza.<sup>24</sup>

## Aspirin for COVID-19

292 A large number of randomised controlled trials of antithrombotic therapy in COVID-19  
293 are registered, including trials of therapeutic doses of heparin, direct acting oral  
294 anticoagulants, anti-platelet agents, serine protease inhibitors, and thrombolytics.<sup>27</sup> In  
295 critically-ill patients, the INSPIRATION, REMAP-CAP, ACTIV-4a and ATTACC trials  
296 did not report a benefit in clinical outcomes from therapeutic anticoagulation.<sup>28,29</sup>  
297 Similarly, preliminary results from the COALIZAO-ACTION trial did not show a benefit  
298 from therapeutic anticoagulation (either heparin or rivaroxaban) in a combined  
299 endpoint of mortality, successful discharge, or need for oxygen in hospitalised patients  
300 with elevated D-dimers.<sup>30</sup> However, the REMAP-CAP/ACTIV-4a/ATTACC  
301 investigators have reported that in non-critically ill COVID-19 patients, compared to  
302 thromboprophylaxis doses, heparin at therapeutic doses was associated with an  
303 absolute increase of 4.6% (95% credible interval 0.7 to 8.1) in the proportion of  
304 participants surviving to hospital discharge without receipt of organ support during the  
305 first 21 days.<sup>31</sup>

306 Although there are currently no other published randomised trial data on the use of  
307 aspirin in COVID-19, the REMAP-CAP/ACTIV-4a/ATTACC report does suggest that  
308 antithrombotic therapy may be important in some patients.<sup>31</sup> The lack of meaningful  
309 benefit from aspirin in our trial could be because antiplatelet therapy confers no  
310 significant additional benefit on top of high rates of antithrombotic therapy with LMWH  
311 and corticosteroid treatment diminishing thrombo-inflammatory stimulation.  
312 Alternatively, other non-platelet pathways leading to thrombosis and alveolar damage  
313 may be more important determinants of clinical outcomes.

314 Any potential benefit of antithrombotic therapies in COVID-19 patients may also  
315 depend on timing of treatment initiation, especially if thrombi have already developed

## Aspirin for COVID-19

316 by the time of admission.<sup>32</sup> Thromboembolic events and microthrombi are common in  
317 COVID-19 patients on either prophylactic or therapeutic anticoagulation.<sup>33</sup> The  
318 apparent lack of benefit in INSPIRATION and the REMAP-CAP/ACTIV-4a/ATTACC  
319 severe disease cohorts suggests that these patients might have passed the point at  
320 which any benefit from therapeutic anticoagulation could be gained.<sup>28,29</sup> Although we  
321 found no evidence of heterogeneity based on duration of symptoms, baseline disease  
322 severity, or background thrombotic prophylaxis regimen, ongoing trials of aspirin in  
323 ambulatory populations and those exploring more potent anti-platelet inhibition and  
324 fibrinolysis should provide further insights.

325 Strengths of this trial included that it was randomised, had a large sample size, broad  
326 eligibility criteria, and 99% of patients were followed up for the primary outcome. The  
327 trial also had some limitations. Detailed information on radiological or physiological  
328 outcomes was not collected. Although this randomised trial is open label (i.e.,  
329 participants and local hospital staff are aware of the assigned treatment), the primary  
330 and secondary outcomes are unambiguous and were ascertained without bias through  
331 linkage to routine health records. However, it cannot be excluded that reporting of  
332 thromboembolic and bleeding events might have been influenced by knowledge of  
333 treatment allocation. Nevertheless, the proportional effects of aspirin on these events  
334 were very similar to those reported in previous large clinical trials of aspirin in people  
335 with prior cardiovascular disease.<sup>6</sup>

336 The RECOVERY trial only studied hospitalised COVID-19 patients and, therefore, is  
337 not able to provide evidence on the safety and efficacy of aspirin used in other patient  
338 groups. Further studies to identify the safety and efficacy of aspirin in non-hospitalised  
339 patients are needed and are ongoing.

## Aspirin for COVID-19

340 In summary, the results of this large, randomised trial do not support the addition of  
341 aspirin to standard thromboprophylaxis or therapeutic anticoagulation in patients  
342 hospitalised with COVID-19.

343

344



## Aspirin for COVID-19

### 345 **Contributors**

346 This manuscript was initially drafted by PWH and MJL, further developed by the  
347 Writing Committee, and approved by all members of the trial steering committee. PWH  
348 and MJL vouch for the data and analyses, and for the fidelity of this report to the study  
349 protocol and data analysis plan. PWH, JKB, MB, LCC, JD, SNF, TJ, EJ, KJ, WSL, AM,  
350 AM, KR, GT, MM, RH, and MJL designed the trial and study protocol. MM, MC, G P-  
351 A, LP, NB, ST, VC, TB, HT, BE, DC, TW, RS, CG and the Data Linkage team at the  
352 RECOVERY Coordinating Centre, and the Health Records and Local Clinical Centre  
353 staff listed in the appendix collected the data. NS, ES and JRE did the statistical  
354 analysis. All authors contributed to data interpretation and critical review and revision  
355 of the manuscript. PWH and MJL had access to the study data and had final  
356 responsibility for the decision to submit for publication.

357

## Aspirin for COVID-19

### 358 **Writing Committee (on behalf of the RECOVERY Collaborative Group):**

359 Peter W Horby,\* Guilherme Pessoa-Amorim,\* Natalie Staplin,\* Jonathan R  
360 Emberson, Mark Campbell, Enti Spata, Leon Peto, Nigel J Brunskill, Simon Tiberi,  
361 Victor Chew, Thomas Brown, Hasan Tahir, Beate Ebert, David Chadwick, Tony  
362 Whitehouse, Rahuldeb Sarkar, Clive Graham, J Kenneth Baillie, Buddha Basnyat,<sup>q</sup>  
363 Maya H Buch, Lucy C Chappell, Jeremy Day, Saul N Faust, Raph L Hamers,  
364 Thomas Jaki, Edmund Juszczak, Katie Jeffery, Wei Shen Lim, Alan Montgomery,  
365 Andrew Mumford, Kathryn Rowan, Guy Thwaites, Marion Mafham,<sup>+</sup> Richard  
366 Haynes,<sup>+</sup> Martin J Landray.<sup>+</sup>

367 \* PWH, GPA and NS made an equal contribution

368 + MM, RH and MJL made an equal contribution

### 369 **Data Monitoring Committee**

370 Peter Sandercock, Janet Darbyshire, David DeMets, Robert Fowler, David Lalloo,  
371 Mohammed Munavvar (from January 2021), Ian Roberts (until December 2020),  
372 Janet Wittes.

### 373 **Declaration of interests**

374 The authors have no conflict of interest or financial relationships relevant to the  
375 submitted work to disclose. No form of payment was given to anyone to produce the  
376 manuscript. All authors have completed and submitted the ICMJE Form for Disclosure  
377 of Potential Conflicts of Interest. The Nuffield Department of Population Health at the  
378 University of Oxford has a staff policy of not accepting honoraria or consultancy fees

## Aspirin for COVID-19

379 directly or indirectly from industry (see [https://www.ndph.ox.ac.uk/files/about/ndph-](https://www.ndph.ox.ac.uk/files/about/ndph-independence-of-research-policy-jun-20.pdf)  
380 [independence-of-research-policy-jun-20.pdf](https://www.ndph.ox.ac.uk/files/about/ndph-independence-of-research-policy-jun-20.pdf)).

### 381 **Data sharing**

382 The protocol, consent form, statistical analysis plan, definition & derivation of clinical  
383 characteristics & outcomes, training materials, regulatory documents, and other  
384 relevant study materials are available online at [www.recoverytrial.net](http://www.recoverytrial.net). As described in  
385 the protocol, the trial Steering Committee will facilitate the use of the study data and  
386 approval will not be unreasonably withheld. Deidentified participant data will be made  
387 available to bona fide researchers registered with an appropriate institution within 3  
388 months of publication. However, the Steering Committee will need to be satisfied that  
389 any proposed publication is of high quality, honours the commitments made to the  
390 study participants in the consent documentation and ethical approvals, and is  
391 compliant with relevant legal and regulatory requirements (e.g. relating to data  
392 protection and privacy). The Steering Committee will have the right to review and  
393 comment on any draft manuscripts prior to publication. Data will be made available in  
394 line with the policy and procedures described at: [https://www.ndph.ox.ac.uk/data-](https://www.ndph.ox.ac.uk/data-access)  
395 [access](https://www.ndph.ox.ac.uk/data-access). Those wishing to request access should complete the form at  
396 [https://www.ndph.ox.ac.uk/files/about/data\\_access\\_enquiry\\_form\\_13\\_6\\_2019.docx](https://www.ndph.ox.ac.uk/files/about/data_access_enquiry_form_13_6_2019.docx)  
397 and e-mail to: [data.access@ndph.ox.ac.uk](mailto:data.access@ndph.ox.ac.uk)

398

### 399 **Acknowledgements**

400 Above all, we would like to thank the thousands of patients who participated in this  
401 trial. We would also like to thank the many doctors, nurses, pharmacists, other allied

## Aspirin for COVID-19

402 health professionals, and research administrators at 176 NHS hospital organisations  
403 across the whole of the UK, supported by staff at the National Institute of Health  
404 Research (NIHR) Clinical Research Network, NHS DigiTrials, Public Health England,  
405 Department of Health & Social Care, the Intensive Care National Audit & Research  
406 Centre, Public Health Scotland, National Records Service of Scotland, the Secure  
407 Anonymised Information Linkage (SAIL) at University of Swansea, and the NHS in  
408 England, Scotland, Wales and Northern Ireland.

409 The RECOVERY trial is supported by grants to the University of Oxford from UK  
410 Research and Innovation (UKRI)/NIHR (Grant reference: MC\_PC\_19056), the  
411 Department of Health and Social Care (DHSC)/UKRI/NIHR COVID-19 Rapid  
412 Response Grant (COV19-RECPLA) and the Wellcome Trust (Grant Ref:  
413 222406/Z/20/Z) through the COVID-19 Therapeutics Accelerator. Core funding is  
414 provided by NIHR Oxford Biomedical Research Centre, Wellcome, the Bill and  
415 Melinda Gates Foundation, the Foreign, Commonwealth and development  
416 Department, Health Data Research UK, the Medical Research Council Population  
417 Health Research Unit, the NIHR Health Protection Unit in Emerging and Zoonotic  
418 Infections, and NIHR Clinical Trials Unit Support Funding. TJ is supported by a grant  
419 from UK Medical Research Council (MC\_UU\_00002/14) and an NIHR Senior  
420 Research Fellowship (NIHR-SRF-2015-08-001). WSL is supported by core funding  
421 provided by NIHR Nottingham Biomedical Research Centre. Combiphar supplied  
422 colchicine free of charge for use in this trial in Indonesia. Abbvie contributed some  
423 supplies of lopinavir-ritonavir for use in this trial. Tocilizumab was provided free of  
424 charge for this trial by Roche Products Limited. REGN-COV2 was provided free of  
425 charge for this trial by Regeneron.

## Aspirin for COVID-19

426 The views expressed in this publication are those of the authors and not necessarily  
427 those of the NHS or the NIHR.

### 428 **Conflicts of interest**

429 The authors have no conflict of interest or financial relationships relevant to the  
430 submitted work to disclose. No form of payment was given to anyone to produce the  
431 manuscript. All authors have completed and submitted the ICMJE Form for Disclosure  
432 of Potential Conflicts of Interest. The Nuffield Department of Population Health at the  
433 University of Oxford has a staff policy of not accepting honoraria or consultancy fees  
434 directly or indirectly from industry (see [https://www.ndph.ox.ac.uk/files/about/ndph-  
435 independence-of-research-policy-jun-20.pdf](https://www.ndph.ox.ac.uk/files/about/ndph-independence-of-research-policy-jun-20.pdf)).

436

## Aspirin for COVID-19

### 437 References

- 438 1. Jimenez D, Garcia-Sanchez A, Rali P, et al. Incidence of VTE and Bleeding  
439 Among Hospitalized Patients With Coronavirus Disease 2019: A Systematic Review  
440 and Meta-analysis. *Chest* 2021; **159**(3): 1182-96.
- 441 2. Kunutsor SK, Laukkanen JA. Incidence of venous and arterial  
442 thromboembolic complications in COVID-19: A systematic review and meta-analysis.  
443 *Thromb Res* 2020; **196**: 27-30.
- 444 3. Klok FA, Kruip M, van der Meer NJM, et al. Confirmation of the high  
445 cumulative incidence of thrombotic complications in critically ill ICU patients with  
446 COVID-19: An updated analysis. *Thromb Res* 2020; **191**: 148-50.
- 447 4. Smilowitz NR, Subashchandran V, Yuriditsky E, et al. Thrombosis in  
448 hospitalized patients with viral respiratory infections versus COVID-19. *Am Heart J*  
449 2021; **231**: 93-5.
- 450 5. Carestia A, Davis RP, Grosjean H, Lau MW, Jenne CN. Acetylsalicylic acid  
451 inhibits intravascular coagulation during Staphylococcus aureus-induced sepsis in  
452 mice. *Blood* 2020; **135**(15): 1281-6.
- 453 6. Antithrombotic Trialists C. Collaborative meta-analysis of randomised trials of  
454 antiplatelet therapy for prevention of death, myocardial infarction, and stroke in high  
455 risk patients. *BMJ* 2002; **324**(7329): 71-86.
- 456 7. Manne BK, Denorme F, Middleton EA, et al. Platelet gene expression and  
457 function in patients with COVID-19. *Blood* 2020; **136**(11): 1317-29.
- 458 8. RECOVERY Collaborative Group, Horby PW, Mafham M, et al. Lopinavir-  
459 ritonavir in patients admitted to hospital with COVID-19 (RECOVERY): a  
460 randomised, controlled, open-label, platform trial. *Lancet* 2020; **396**(10259 ): 1345-  
461 52.
- 462 9. RECOVERY Collaborative Group, Horby P, Mafham M, et al. Effect of  
463 Hydroxychloroquine in Hospitalized Patients with Covid-19. *N Engl J Med* 2020;  
464 **383**(21): 2030-40.
- 465 10. RECOVERY Collaborative Group, Horby P, Lim WS, et al. Dexamethasone in  
466 Hospitalized Patients with Covid-19. *N Engl J Med* 2021; **384**(8): 693-704.
- 467 11. RECOVERY Collaborative Group. Azithromycin in patients admitted to  
468 hospital with COVID-19 (RECOVERY): a randomised, controlled, open-label,  
469 platform trial. *Lancet* 2021; **397**(10274): 605-12.
- 470 12. RECOVERY Collaborative Group. Tocilizumab in patients admitted to hospital  
471 with COVID-19 (RECOVERY): a randomised, controlled, open-label, platform trial.  
472 *Lancet* 2021; **397**(10285): 1637-45.
- 473 13. RECOVERY Collaborative Group. Convalescent plasma in patients admitted  
474 to hospital with COVID-19 (RECOVERY): a randomised controlled, open-label,  
475 platform trial. *Lancet* 2021.

## Aspirin for COVID-19

- 476 14. RECOVERY Collaborative Group, Horby PW, Campbell M, et al. Colchicine in  
477 patients admitted to hospital with COVID-19 (RECOVERY): a randomised,  
478 controlled, open-label, platform trial. *medRxiv* 2021: 2021.05.18.21257267.
- 479 15. Antithrombotic Trialists C, Baigent C, Blackwell L, et al. Aspirin in the primary  
480 and secondary prevention of vascular disease: collaborative meta-analysis of  
481 individual participant data from randomised trials. *Lancet* 2009; **373**(9678): 1849-60.
- 482 16. Jin S, Jin Y, Xu B, Hong J, Yang X. Prevalence and Impact of Coagulation  
483 Dysfunction in COVID-19 in China: A Meta-Analysis. *Thromb Haemost* 2020;  
484 **120**(11): 1524-35.
- 485 17. Zhang A, Leng Y, Zhang Y, et al. Meta-analysis of coagulation parameters  
486 associated with disease severity and poor prognosis of COVID-19. *Int J Infect Dis*  
487 2020; **100**: 441-8.
- 488 18. Skendros P, Mitsios A, Chrysanthopoulou A, et al. Complement and tissue  
489 factor-enriched neutrophil extracellular traps are key drivers in COVID-19  
490 immunothrombosis. *J Clin Invest* 2020; **130**(11): 6151-7.
- 491 19. Middleton EA, He XY, Denorme F, et al. Neutrophil extracellular traps  
492 contribute to immunothrombosis in COVID-19 acute respiratory distress syndrome.  
493 *Blood* 2020; **136**(10): 1169-79.
- 494 20. Petitto E, Falcinelli E, Paliani U, et al. Association of Neutrophil Activation,  
495 More Than Platelet Activation, With Thrombotic Complications in Coronavirus  
496 Disease 2019. *J Infect Dis* 2021; **223**(6): 933-44.
- 497 21. Taus F, Salvagno G, Cane S, et al. Platelets Promote Thromboinflammation  
498 in SARS-CoV-2 Pneumonia. *Arterioscler Thromb Vasc Biol* 2020; **40**(12): 2975-89.
- 499 22. Zhang S, Liu Y, Wang X, et al. SARS-CoV-2 binds platelet ACE2 to enhance  
500 thrombosis in COVID-19. *J Hematol Oncol* 2020; **13**(1): 120.
- 501 23. Hariri LP, North CM, Shih AR, et al. Lung Histopathology in Coronavirus  
502 Disease 2019 as Compared With Severe Acute Respiratory Syndrome and H1N1  
503 Influenza: A Systematic Review. *Chest* 2021; **159**(1): 73-84.
- 504 24. Ackermann M, Verleden SE, Kuehnel M, et al. Pulmonary Vascular  
505 Endothelialitis, Thrombosis, and Angiogenesis in Covid-19. *N Engl J Med* 2020;  
506 **383**(2): 120-8.
- 507 25. Varga Z, Flammer AJ, Steiger P, et al. Endothelial cell infection and  
508 endotheliitis in COVID-19. *Lancet* 2020; **395**(10234): 1417-8.
- 509 26. Carsana L, Sonzogni A, Nasr A, et al. Pulmonary post-mortem findings in a  
510 series of COVID-19 cases from northern Italy: a two-centre descriptive study. *Lancet*  
511 *Infect Dis* 2020.
- 512 27. Talasaz AH, Sadeghipour P, Kakavand H, et al. Recent Randomized Trials of  
513 Antithrombotic Therapy for Patients With COVID-19: JACC State-of-the-Art Review.  
514 *J Am Coll Cardiol* 2021; **77**(15): 1903-21.

## Aspirin for COVID-19

- 515 28. Zarychanski R. Therapeutic Anticoagulation in Critically Ill Patients with Covid-  
516 19 – Preliminary Report. *medRxiv* 2021: 2021.03.10.21252749.
- 517 29. Inspiration Investigators, Sadeghipour P, Talasaz AH, et al. Effect of  
518 Intermediate-Dose vs Standard-Dose Prophylactic Anticoagulation on Thrombotic  
519 Events, Extracorporeal Membrane Oxygenation Treatment, or Mortality Among  
520 Patients With COVID-19 Admitted to the Intensive Care Unit: The INSPIRATION  
521 Randomized Clinical Trial. *JAMA* 2021; **325**(16): 1620-30.
- 522 30. R. D. Lopes. AntiCoagulaTlon cOroNavirus - ACTION. 2021. AntiCoagulaTlon  
523 cOroNavirus - American College of Cardiology (acc.org) (accessed 22 May 2021  
524 2021).
- 525 31. Lawler PR, Goligher EC, Berger JS, et al. Therapeutic Anticoagulation in Non-  
526 Critically Ill Patients with Covid-19. *medRxiv* 2021: 2021.05.13.21256846.
- 527 32. Yamakawa K, Umemura Y, Murao S, Hayakawa M, Fujimi S. Optimal Timing  
528 and Early Intervention With Anticoagulant Therapy for Sepsis-Induced Disseminated  
529 Intravascular Coagulation. *Clin Appl Thromb Hemost* 2019; **25**: 1076029619835055.
- 530 33. Klok FA, Kruij M, van der Meer NJM, et al. Incidence of thrombotic  
531 complications in critically ill ICU patients with COVID-19. *Thromb Res* 2020; **191**:  
532 145-7.  
533
- 534



## Aspirin for COVID-19

535

### 536 **Figures**

#### 537 **Figure 1: Trial profile**

538 ITT=intention to treat. \*Number recruited overall during period that adult participants  
539 could be recruited into aspirin comparison. † Includes 379/7351 (5.2%) patients in  
540 the aspirin arm and 407/7541 (5.4%) patients in the usual care arm allocated to  
541 tocilizumab.

#### 542 **Figure 2: Effect of allocation to aspirin on 28-day mortality**

#### 543 **Figure 3: Effect of allocation to aspirin on 28-day mortality by baseline** 544 **characteristics**

545 Subgroup-specific rate ratio estimates are represented by squares (with areas of the  
546 squares proportional to the amount of statistical information) and the lines through  
547 them correspond to the 95% CIs. The ethnicity, days since onset and use of  
548 corticosteroids subgroups exclude those with missing data, but these patients are  
549 included in the overall summary diamond.

550

## Aspirin for COVID-19

551 **Table 1: Baseline characteristics**

|                                                             | Treatment allocation |                     |
|-------------------------------------------------------------|----------------------|---------------------|
|                                                             | Aspirin (n=7351)     | Usual care (n=7541) |
| Age, years                                                  | 59.2 (14.1)          | 59.3 (14.3)         |
| <70                                                         | 5658 (77%)           | 5786 (77%)          |
| ≥70 to <80                                                  | 1163 (16%)           | 1165 (15%)          |
| ≥80                                                         | 530 (7%)             | 590 (8%)            |
| Sex                                                         |                      |                     |
| Male                                                        | 4570 (62%)           | 4631 (61%)          |
| Female*                                                     | 2781 (38%)           | 2910 (39%)          |
| Ethnicity                                                   |                      |                     |
| White                                                       | 5474 (74%)           | 5655 (75%)          |
| Black, Asian, and minority ethnic                           | 1176 (16%)           | 1202 (16%)          |
| Unknown                                                     | 701 (10%)            | 684 (9%)            |
| Number of days since symptom onset                          | 9 (7-12)             | 9 (6-12)            |
| Number of days since hospitalisation                        | 1 (1-3)              | 2 (1-3)             |
| Respiratory support received                                |                      |                     |
| None/simple oxygen                                          | 4936 (67%)           | 5036 (67%)          |
| Non invasive ventilation                                    | 2057 (28%)           | 2133 (28%)          |
| Invasive mechanical ventilation                             | 358 (5%)             | 372 (5%)            |
| Biochemistry                                                |                      |                     |
| C-reactive protein, mg/L                                    | 88 (47-146)          | 91 (47-150)         |
| Creatinine, umol/L                                          | 76 (63-93)           | 76 (62-92)          |
| D-dimer, ng/mL                                              | 475 (205-1088)       | 489 (210-1083)      |
| Previous diseases                                           |                      |                     |
| Diabetes                                                    | 1588 (22%)           | 1659 (22%)          |
| Heart disease                                               | 776 (11%)            | 788 (10%)           |
| Chronic lung disease                                        | 1425 (19%)           | 1411 (19%)          |
| Tuberculosis                                                | 20 (<0.5%)           | 21 (<0.5%)          |
| HIV                                                         | 25 (<0.5%)           | 21 (<0.5%)          |
| Severe liver disease†                                       | 67 (1%)              | 53 (1%)             |
| Severe kidney impairment‡                                   | 214 (3%)             | 251 (3%)            |
| Any of the above                                            | 3154 (43%)           | 3247 (43%)          |
| Use of corticosteroids                                      |                      |                     |
| Yes                                                         | 6906 (94%)           | 7109 (94%)          |
| No                                                          | 441 (6%)             | 425 (6%)            |
| Missing                                                     | 4 (<0.5%)            | 7 (<0.5%)           |
| Severe acute respiratory syndrome coronavirus 2 test result |                      |                     |
| Positive                                                    | 7140 (97%)           | 7327 (97%)          |
| Negative                                                    | 87 (1%)              | 86 (1%)             |
| Unknown                                                     | 124 (2%)             | 128 (2%)            |

Results are count (%), mean ± standard deviation, or median (inter-quartile range). \*Includes 58 pregnant women. †Defined as requiring ongoing specialist care. ‡Defined as estimated glomerular filtration rate <30 mL/min/1.73m<sup>2</sup>

## Aspirin for COVID-19

553 **Table 2: Effect of allocation to aspirin on key study outcomes**

|                                                         | Treatment allocation |                     | RR (95% CI)      | p value |
|---------------------------------------------------------|----------------------|---------------------|------------------|---------|
|                                                         | Aspirin (n=7351)     | Usual care (n=7541) |                  |         |
| <b>Primary outcome:</b>                                 |                      |                     |                  |         |
| 28-day mortality                                        | 1222 (17%)           | 1299 (17%)          | 0.96 (0.89-1.04) | 0.35    |
| <b>Secondary outcomes:</b>                              |                      |                     |                  |         |
| Median time to being discharged alive, days             | 8 (5 to >28)         | 9 (5 to >28)        |                  |         |
| Discharged from hospital within 28 days                 | 5496 (75%)           | 5548 (74%)          | 1.06 (1.02-1.10) | 0.0062  |
| Receipt of invasive mechanical ventilation or death*    | 1473/6993 (21%)      | 1569/7169 (22%)     | 0.96 (0.90-1.03) | 0.23    |
| Invasive mechanical ventilation                         | 772/6993 (11%)       | 829/7169 (12%)      | 0.95 (0.87-1.05) | 0.32    |
| Death                                                   | 1076/6993 (15%)      | 1141/7169 (16%)     | 0.97 (0.90-1.04) | 0.39    |
| <b>Subsidiary clinical outcomes</b>                     |                      |                     |                  |         |
| Use of ventilation                                      | 1131/4936 (23%)      | 1198/5036 (24%)     | 0.96 (0.90-1.03) | 0.30    |
| Non-invasive ventilation                                | 1101/4936 (22%)      | 1162/5036 (23%)     | 0.97 (0.90-1.04) | 0.36    |
| Invasive mechanical ventilation                         | 296/4936 (6%)        | 325/5036 (6%)       | 0.93 (0.80-1.08) | 0.35    |
| Successful cessation of invasive mechanical ventilation | 135/358 (38%)        | 135/372 (36%)       | 1.08 (0.85-1.37) | 0.54    |
| Renal replacement therapy                               | 273/7291 (4%)        | 282/7480 (4%)       | 0.99 (0.84-1.17) | 0.93    |

RR=Rate Ratio for the outcomes of 28-day mortality and hospital discharge, and risk ratio for the outcome of receipt of invasive mechanical ventilation or death (and its subcomponents). CI=confidence interval. \*Analyses exclude those on invasive mechanical ventilation at randomization.

554

555

**Figure 1: Trial profile**

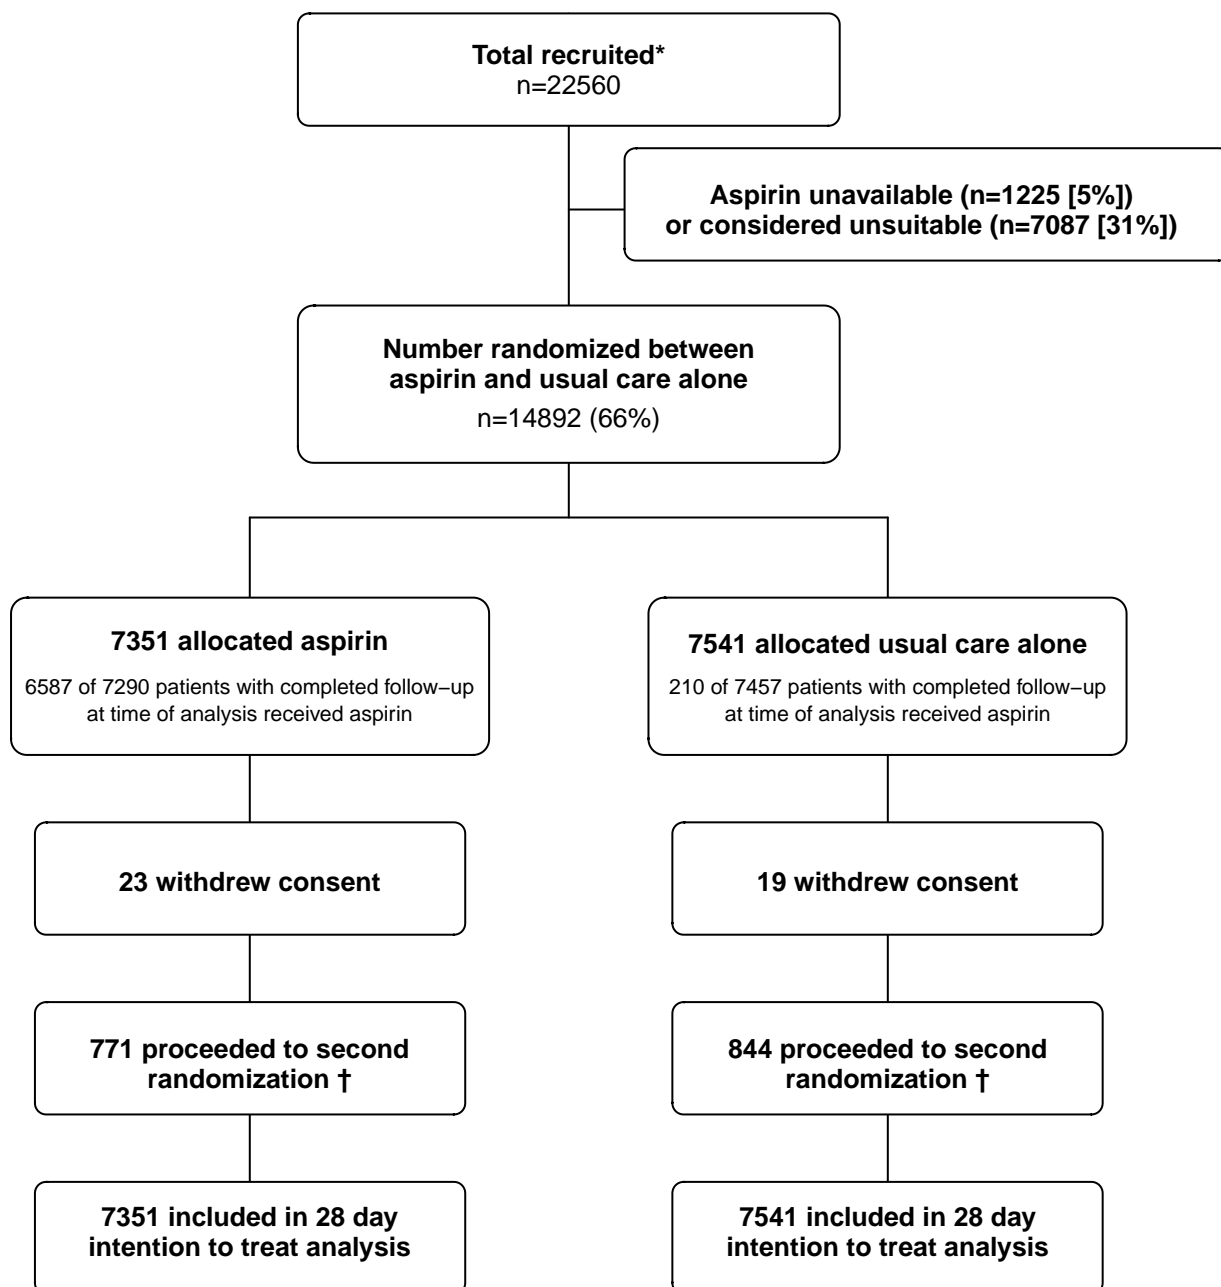

ITT=intention to treat. \*Number recruited overall during period that adult participants could be recruited into aspirin comparison.  
† Includes 379/7351 (5.2%) patients in the aspirin arm and 407/7541 (5.4%) patients in the usual care arm allocated to tocilizumab.

**Figure 2: Effect of allocation to aspirin on 28-day mortality**

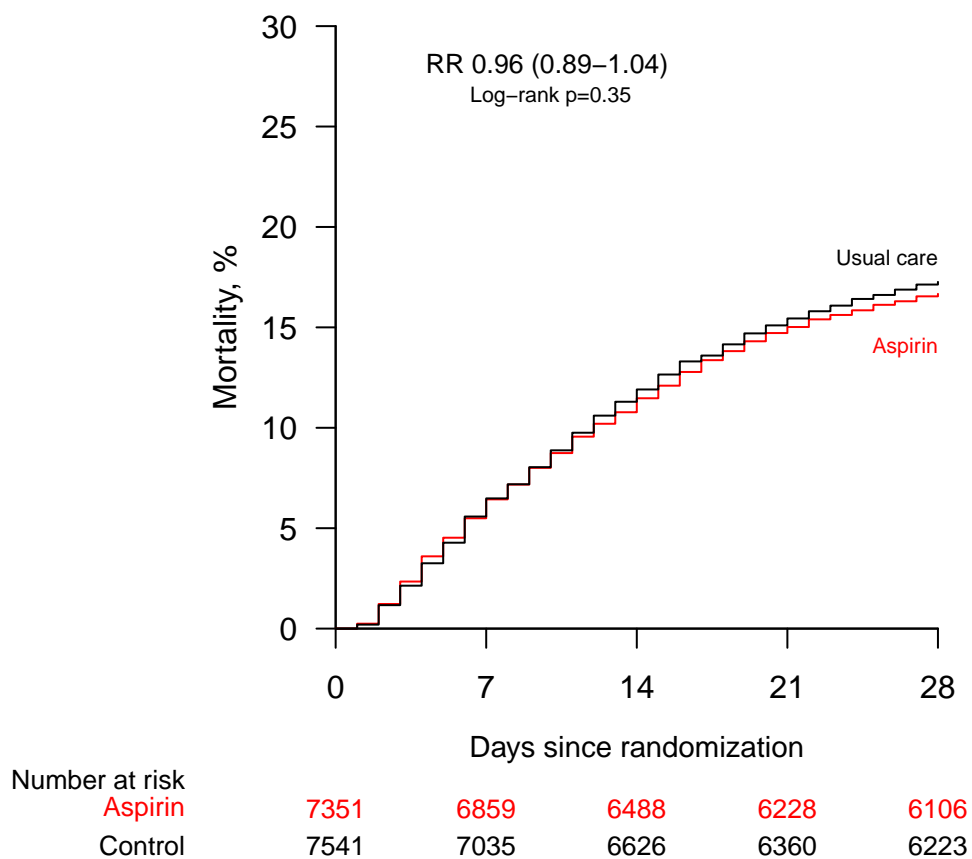

**Figure 3: Effects of allocation to aspirin on 28-day mortality by baseline characteristics**

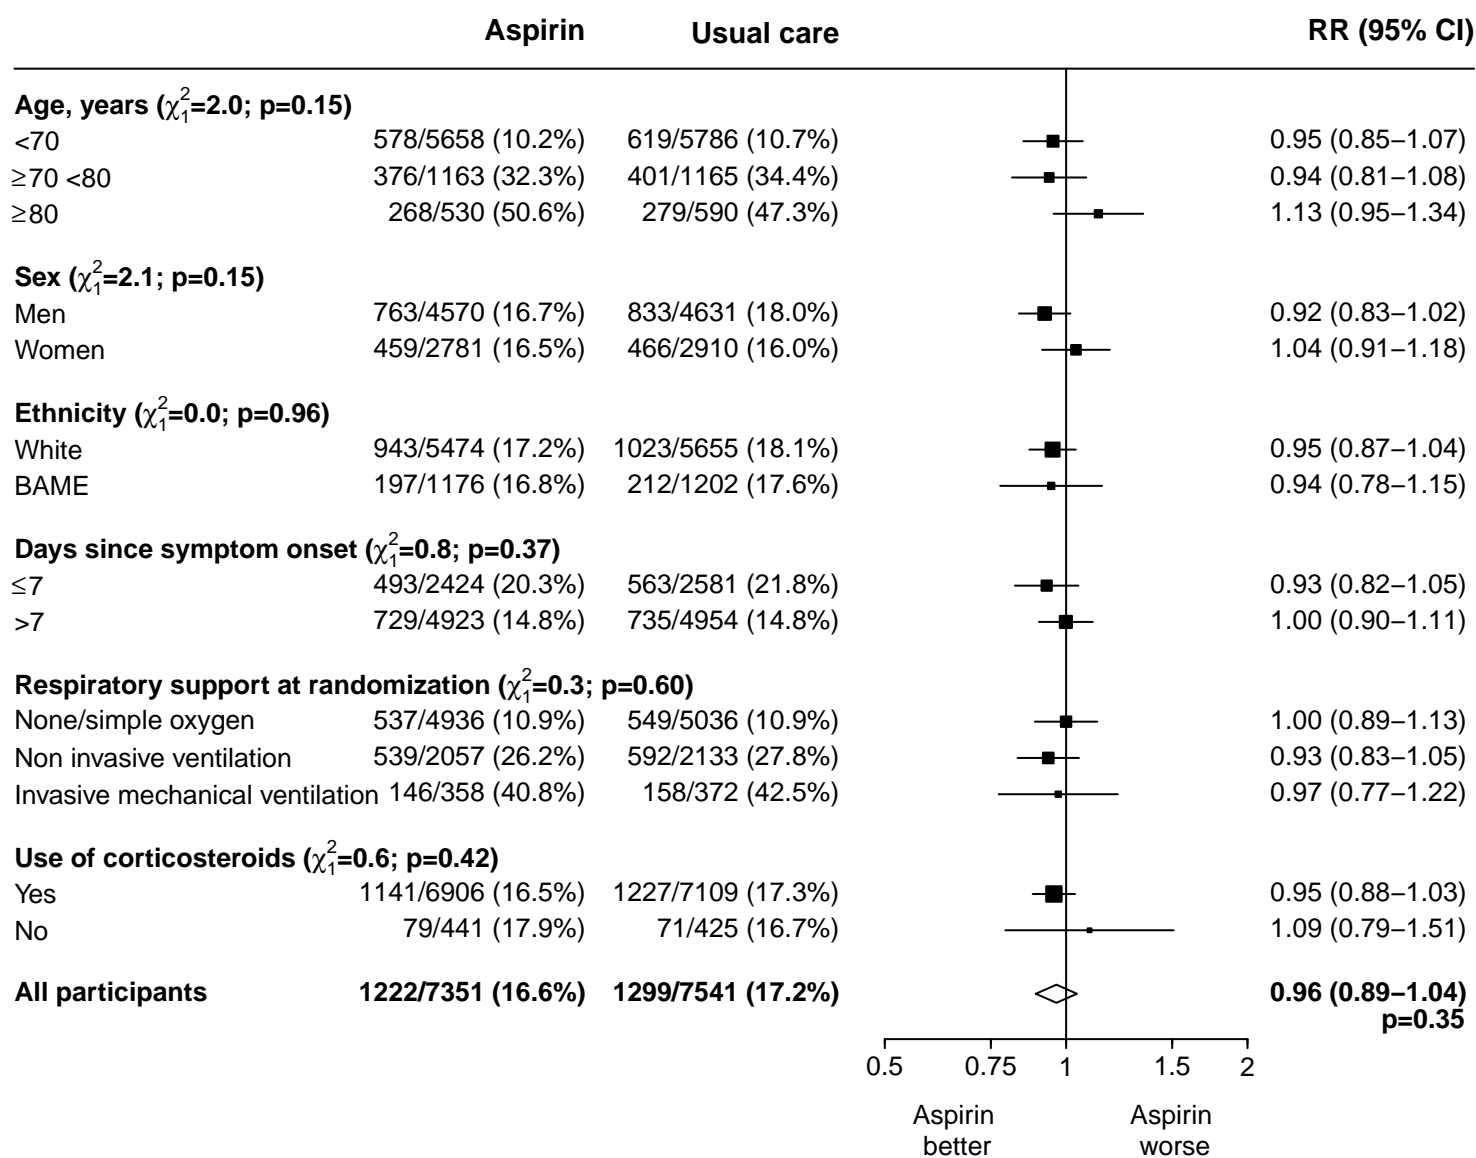

Source: https://medrxiv.org/content/medrxiv/early/2021/06/08/2021.06.08.21258132.full.pdf
